# Supplementary material
Source: MDPI journal article supplement (https://www.mdpi.com/2073-4395/6/4/49)
Supplement: s1 [file s1]

**Figure S1.** Scatter plot of yield and quality across harvests from the F1 field trial [FW: Fresh weight (g); WSC: water-soluble carbohydrate (% dry matter); CP: crude protein (% dry matter); NDF: neutral detergent fibre (% dry matter); ADF: acid detergent fibre (% dry matter); DMD: dry matter digestibility (%)]

**Figure S2.** Scatter plot of yield and quality across harvests from the F2 field trial [for trait abbreviations and units, see Figure S1].
